# Supplementary material for: Stimulation in primary and secondary metabolism by elevated carbon dioxide alters green tea quality in Camellia sinensis L
Source: PubMed Central journal article supplement (PMC5554289; doi:10.1038/s41598-017-08465-1), 2017-08-11
Supplement: 41598_2017_8465_MOESM1_ESM.pdf [file 41598_2017_8465_MOESM1_ESM.pdf]

**Stimulation in primary and secondary metabolism by elevated carbon dioxide alters green tea quality in *Camellia sinensis* L.**

**Xin Li<sup>1</sup>, Golam Jalal Ahammed<sup>1,2</sup>, Zhi-Xin Li<sup>1,3</sup>, Lan Zhang<sup>1</sup>, Ji-Peng Wei<sup>1</sup>, Chen Shen<sup>1,3</sup>, Peng Yan<sup>1</sup>, Li-Ping Zhang<sup>1</sup>, Wen-Yan Han<sup>1,\*</sup>**

<sup>1</sup> *Key Laboratory of Tea Biology and Resources Utilization, Ministry of Agriculture, Tea Research Institute, Chinese Academy of Agricultural Sciences, 9 Meiling Road, Hangzhou, 310008, P.R. China*

<sup>2</sup> *Department of Horticulture, Zijingang Campus, Zhejiang University, Yuhangtang Road 866, Hangzhou, 310058, P.R. China*

<sup>3</sup> *Graduate School of Chinese Academy of Agricultural Sciences, Beijing, P. R. China*

\* Corresponding author: **Wen-Yan Han**

E-mail address: [hanwy@tricaas.com](mailto:hanwy@tricaas.com) (W.-Y. Han)

**Supplemental Table S1.** Primers used for real time qPCR assays and treatment response (%) of transcripts whose abundance was significantly altered in tea seedlings grown at elevated CO<sub>2</sub> concentration (800 μmol mol<sup>-1</sup>) compared to ambient CO<sub>2</sub> concentration (380 μmol mol<sup>-1</sup>).

| Gene         | Functional annotation              | Primer pairs                                                               | %<br>(x 100) | <i>p</i> |
|--------------|------------------------------------|----------------------------------------------------------------------------|--------------|----------|
| <i>Actin</i> |                                    | U60481.1<br>F: 5'-CTCAGCACATTCCAGCAGAT-3'<br>R: 5'-ACTGCAGCTTTCCCAGAAAT-3' |              |          |
| <i>CsPAL</i> | <i>PHENYLALANINE AMMONIA-LYASE</i> | D26596<br>F: 5'-GAATGCCGGTCTTATCCACT-3'<br>R: 5'-CGGTGAACACCTTGTCAAAC-3'   | 5.14         | 0.137    |
| <i>CsC4H</i> | <i>CINNAMATE 4-HYDROXYLASE</i>     | AY641731<br>F: 5'-CGAGAGGTTCTTGGAAGAGG-3'<br>R: 5'-AGAATTGGCAGAGCAAGGAT-3' | 3.37         | 0.119    |
| <i>Cs4CL</i> | <i>P-COUMARATE:COA LIGASE</i>      | DQ194356<br>F: 5'-GGAGGTTATCCTGGACCTCA-3'<br>R: 5'-GGCAAGCCTTGTAGTGTGAA-3' | 3.09         | 0.216    |
| <i>CsCHS</i> | <i>CHALCONE SYNTHASE</i>           | AY169403<br>F: 5'-GGCAATCAAAGAATGGGG-3'<br>R: 5'-ATGGGCGAAGACCGAGT-3'      | 2.44         | 0.102    |
| <i>CsCHI</i> | <i>CHALCONE ISOMERASE</i>          | DQ904329<br>F: 5'-CACAAAGAAGATTATGGGTGAAG-3'                               | 6.19         | 0.331    |

|               |                                                            |          |                                   |       |       |
|---------------|------------------------------------------------------------|----------|-----------------------------------|-------|-------|
|               |                                                            |          | R: 5'-CAAACCTAGAAGTTGCCAAGAGT-3'  |       |       |
| <i>CsF3H</i>  | <i>FLAVANONE 3-HYDROXYLASE</i>                             | AY641730 | F: 5'-CTACTCAAGATGGCCCGACAA-3'    | 1.85  | 0.102 |
|               |                                                            |          | R: 5'-ACAACACCTCCAGCAACTTGC-3'    |       |       |
| <i>CsDFR</i>  | <i>DIHYDROFLAVONOL 4-REDUCTASE</i>                         | AB018685 | F: 5'-ATTGGCAGAGAAAGCAGCAT-3'     | 3.29  | 0.219 |
|               |                                                            |          | R: 5'-GTGATTAGGCTTGGTGGGAA-3'     |       |       |
| <i>CsANS</i>  | <i>ANTHOCYANIDIN SYNTHASE</i>                              | AY830416 | F: 5'-GGCCACAAGTGCCTACAATTG-3'    | 2.38  | 0.122 |
|               |                                                            |          | R: 5'-CCCATGATTCACCAAATGCA-3'     |       |       |
| <i>CsUFGT</i> | <i>UDP- GLUCOSE FLAVONOID<br/>3-O-GLUCOSYL TRANSFERASE</i> | GH618818 | F: 5'-GGCAAGAAGCTAATAGGGTCGTT-3'  | 3.46  | 0.203 |
|               |                                                            |          | R: 5'-TTGTATCATTCCGGAAGTGgTGGG-3' |       |       |
| <i>CsANR</i>  | <i>ANTHOCYANIDIN REDUCTASE</i>                             | AY641729 | F: 5'-GCGAAGTTGATCCTCTCGTC-3'     | 5.35  | 0.190 |
|               |                                                            |          | R: 5'-AACCACATCGTCAAGTGAACA-3'    |       |       |
| <i>CsLAR</i>  | <i>LEUACOANTHOCYANIDIN REDUCTASE</i>                       | AY169404 | F: 5'-GAATGCCGGTCTTATCCACT-3'     | 0.622 | 0.016 |
|               |                                                            |          | R: 5'-CGGTGAACACCTTGTCAAAC-3'     |       |       |
| <i>CsTIDH</i> | <i>INOSINE 5'-MONOPHOSPHATE<br/>DEHYDROGENASE</i>          | EU106658 | F: 5'-TGCTGAAAGAAGTGGTGTGC'       | 0.195 | 0.006 |
|               |                                                            |          | R: 5'-TCCCTTTTGTGATTGCTTCC-3'     |       |       |
| <i>CsAMS</i>  | <i>S-ADENOSYL-L-METHIONINE<br/>SYNTHASE (sAMS)</i>         | AB041534 | F: 5'-ACCCAACACGATGAGACCG-3'      | 0.634 | 0.027 |
|               |                                                            |          | R: 5'-GCCAATGACAAAGCGACCA-3'      |       |       |
| <i>CsTCS1</i> | <i>TEA CAFFEINE SYNTHASE 1</i>                             | AB031280 | F: 5'-CTGTCGTCTGAGGTTATTGG-3'     | 0.389 | 0.011 |

|                |                                                       |          |                                                                                                 |       |       |
|----------------|-------------------------------------------------------|----------|-------------------------------------------------------------------------------------------------|-------|-------|
| <i>CsGS1</i>   | <i>GLUTAMINE SYNTHETASE</i>                           | AB115184 | R: 5'-GTGCCTGAGTAAGCCAATGA-3'<br>F: 5'-CCCTCTGCTTACGCTCTGT-3'<br>R: 5'-GCTTTTTGGGATCATTAAACG-3' | 2.13  | 0.091 |
| <i>CsGS2</i>   | <i>GLUTAMINE SYNTHETASE</i>                           | AB117934 | F: 5'-GTTTGTGGAGTGGGTGT-3'<br>R: 5'-AGTGCTGGAACCATCGTAG-3'                                      | 0.472 | 0.017 |
| <i>CsGS</i>    | <i>GLUTAMINE SYNTHETASE</i>                           | EU284131 | F: 5'-GGAGGTTATCCTGGACCTCA-3'<br>R: 5'-GGCAAGCCTTGTAGTGTGAA-3'                                  | 3.48  | 0.274 |
| <i>CsGOGAT</i> | <i>GLUTAMINE: 2-OXOGLUTARATE<br/>AMINOTRANSFERASE</i> | JN602371 | F: 5'-ACACTGCCACATCTCAAAGG-3'<br>R: 5'-CCAATTGATCAGCATTGACC-3'                                  | 0.632 | 0.039 |
| <i>CsTS1</i>   | <i>THEANINE SYNTHASE</i>                              | DD401895 | F: 5'-TCTTTCTGGACCTGTGAGTG-3'<br>R: 5'-GCTTGAGGGTAGATAATGAGT-3'                                 | 3.70  | 0.288 |
| <i>CsTS2</i>   | <i>THEANINE SYNTHASE</i>                              | DD401896 | F: 5'-AAGGACCCATTCAGGAGAGG-3'<br>R: 5'-CAATCGGCCACTTCACTTCT-3'                                  | 0.464 | 0.035 |

---
